# Supplementary material for: Derivation and Validation of Shock Index as a parameter for Predicting Long-term Prognosis in Patients with Acute Coronary Syndrome
Source: PubMed Central journal article supplement (PMC5607331; doi:10.1038/s41598-017-12180-2), 2017-09-20
Supplement: 41598_2017_12180_MOESM1_ESM.pdf [file 41598_2017_12180_MOESM1_ESM.pdf]

Derivation and Validation of Shock Index as a parameter for Predicting Long-term Prognosis in

Patients with Acute Coronary Syndrome

Tongtong Yu<sup>1</sup>, Chunyang Tian<sup>1</sup>, Jia Song<sup>1</sup>, Dongxu He<sup>1</sup>, Zhijun Sun<sup>1</sup>, Zhaoqing Sun<sup>1\*</sup>

<sup>1</sup> Department of Cardiology, Shengjing Hospital of China Medical University, Shenyang, Liaoning,

P.R.China

\* Corresponding author:

E-mail: [sunzhaoqing@vip.163.com](mailto:sunzhaoqing@vip.163.com)

Tel: 86-24-9661522211

Fax: 86-24-9661522211

Appendix S1 Effects of multiple variables on all-cause mortality in Univariate Analysis in the Derivation Cohort.

|                                                                          | HR    | 95% CI       | P      |
|--------------------------------------------------------------------------|-------|--------------|--------|
| Age                                                                      | 1.056 | 1.035-1.078  | <0.001 |
| Gender                                                                   | 1.335 | 0.849-2.099  | 0.212  |
| History of Diabetes Mellitus                                             | 1.284 | 0.824-2.000  | 0.269  |
| History of Hypertension                                                  | 1.238 | 0.789-1.941  | 0.353  |
| History of Dyslipidemia                                                  | 0.650 | 0.418-1.010  | 0.055  |
| Current/recent smoker                                                    | 0.669 | 0.429-1.045  | 0.077  |
| History of renal dysfunction                                             | 1.486 | 0.742-2.972  | 0.263  |
| History of MI                                                            | 2.561 | 1.414-4.638  | 0.002  |
| Prior PCI                                                                | 2.072 | 1.122-3.829  | 0.020  |
| Prior peripheral arterial disease                                        | 3.773 | 1.190-11.965 | 0.024  |
| SBP on admission, mm Hg                                                  | 0.997 | 0.987-1.007  | 0.534  |
| Heart rate on admission, beats/min                                       | 1.027 | 1.014-1.040  | <0.001 |
| LVEF, %                                                                  | 0.951 | 0.933-0.969  | <0.001 |
| Diagnosis on admission                                                   | 1.270 | 0.963-1.673  | 0.090  |
| Troponin-I on admission, ng/mL                                           | 1.008 | 1.002-1.015  | 0.006  |
| Left main disease                                                        | 1.346 | 0.694-2.612  | 0.379  |
| Three-vessel disease                                                     | 2.510 | 1.619-3.893  | <0.001 |
| Intra-aortic Balloon Pump                                                | 5.083 | 2.974-8.687  | <0.001 |
| TIMI flow grade 3 post PCI                                               | 0.137 | 0.034-0.557  | 0.005  |
| Use of glycoprotein IIb/IIIa inhibitor                                   | 0.677 | 0.399-1.147  | 0.147  |
| Aspirin                                                                  | 1.104 | 0.348-3.501  | 0.867  |
| Clopidogrel                                                              | 1.309 | 0.413-4.150  | 0.647  |
| Ticagrelor                                                               | 1.081 | 0.150-7.769  | 0.939  |
| Statin                                                                   | 1.153 | 0.422-3.153  | 0.781  |
| Angiotensin-converting enzyme inhibitors / Angiotensin receptor blockers | 0.541 | 0.345-0.850  | 0.008  |
| Beta-blockers                                                            | 0.475 | 0.298-0.757  | 0.002  |

MI, myocardial infarction; bpm, beats per minute; LVEF, left ventricular ejection fraction; h, hour; PCI, percutaneous coronary intervention

Appendix S2 Effects of multiple variables on all-cause mortality in Univariate Analysis in the Validation Cohort.

|                                                                          | HR    | 95% CI       | P      |
|--------------------------------------------------------------------------|-------|--------------|--------|
| Age                                                                      | 1.047 | 1.012-1.082  | 0.008  |
| Gender                                                                   | 1.295 | 0.602-2.785  | 0.508  |
| History of Diabetes Mellitus                                             | 0.716 | 0.306-1.676  | 0.441  |
| History of Hypertension                                                  | 1.978 | 0.876-4.465  | 0.101  |
| History of Dyslipidemia                                                  | 1.097 | 0.486-2.476  | 0.824  |
| Current/recent smoker                                                    | 0.757 | 0.364-1.574  | 0.457  |
| History of renal dysfunction                                             | 0.403 | 0.055-2.964  | 0.372  |
| History of MI                                                            | 0.337 | 0.046-2.480  | 0.286  |
| Prior PCI                                                                | 0.042 | 0.000-7.619  | 0.232  |
| Prior peripheral arterial disease                                        | 0.049 | 0.000-9.502  | 0.649  |
| SBP on admission, mm Hg                                                  | 1.000 | 0.984-1.016  | 0.973  |
| Heart rate on admission, beats/min                                       | 1.037 | 1.018-1.055  | <0.001 |
| LVEF, %                                                                  | 0.958 | 0.924-0.993  | 0.019  |
| Diagnosis on admission                                                   | 1.490 | 1.033-2.150  | 0.033  |
| Troponin-I on admission, ng/mL                                           | 1.005 | 0.994-1.015  | 0.375  |
| Left main disease                                                        | 1.709 | 0.595-4.911  | 0.320  |
| Three-vessel disease                                                     | 1.307 | 0.595-2.871  | 0.504  |
| Intra-aortic Balloon Pump                                                | 2.912 | 0.693-12.248 | 0.145  |
| TIMI flow grade 3 post PCI                                               | 0.137 | 0.018-1.001  | 0.051  |
| Use of glycoprotein IIb/IIIa inhibitor                                   | 1.938 | 0.932-4.028  | 0.076  |
| Aspirin                                                                  | 0.869 | 0.272-2.764  | 0.740  |
| Clopidogrel                                                              | 1.125 | 0.421-4.267  | 0.556  |
| Ticagrelor                                                               | 1.274 | 0.168-9.057  | 0.685  |
| Statin                                                                   | 1.046 | 0.259-2.654  | 0.639  |
| Angiotensin-converting enzyme inhibitors / Angiotensin receptor blockers | 0.527 | 0.233-1.189  | 0.123  |
| Beta-blockers                                                            | 0.563 | 0.250-1.272  | 0.167  |

MI, myocardial infarction; bpm, beats per minute; LVEF, left ventricular ejection fraction; h, hour; PCI, percutaneous coronary intervention
